# Supplementary material for: The cellular protein hnRNP A2/B1 enhances HIV-1 transcription by unfolding LTR promoter G-quadruplexes
Source: PubMed Central journal article supplement (PMC5364415; doi:10.1038/srep45244), 2017-03-24

# **The cellular protein hnRNP A2/B1 enhances HIV-1 transcription by unfolding LTR promoter G-quadruplexes**

Matteo Scalabrin<sup>+</sup>, Ilaria Frasson<sup>+</sup>, Emanuela Ruggiero<sup>+</sup>, Rosalba Perrone, Elena Tosoni, Sara Lago, Martina Tassinari, Giorgio Palù, Sara N. Richter\*

Department of Molecular Medicine, University of Padua, Padua, Italy

\*sara.richter@unipd.it

<sup>+</sup>These authors contributed equally to this work

## **Supplementary Material Legend**

**Table S1.** Oligonucleotides used in this study.

**Table S2.** Energy Transfer, Energy Transfer Difference and Radius (Å) of LTRs in the absence or presence of hnRNP A2 or BSA, at different K<sup>+</sup> concentrations.

**Fig. S1.** FRET-melting curves of LTR-II+III+IV, in the absence or presence of hnRNP A2 or BSA.

**Fig. S2.** FRET-melting curves of LTR-III+IV, in the absence or presence of hnRNP A2 or BSA.

**Fig. S3.** FRET-melting curves of LTR-III, in the absence or presence of hnRNP A2 or BSA.

**Fig. S4.** FRET-melting curves of LTR-IV, in the absence or presence of hnRNP A2 or BSA.

**Fig. S5.** Activity of hnRNP A2/B1 on the HIV-1 LTR promoter in TZM-bl cells.

**Table S1.** Oligonucleotides used in this study.

| Assay                                  | Name                    | Sequence 5'-3'                                                                        |
|----------------------------------------|-------------------------|---------------------------------------------------------------------------------------|
| Pull Down                              | LTR-II+III+IV           | d(TTTTTGGGGACTTTCCAGGGAGGCGTGGCCTGGGCGGGA<br>CTGGGGAGTGGTTTTT- <i>BtnTg</i> )         |
|                                        | LTR-II+III+IV<br>M4+5   | d(TTTTTGGGGACTTTCCAGGGAGGCGTGGCCTGTGCGTGA<br>CTGGGGAGTGGTTTTT- <i>BtnTg</i> )         |
|                                        | Random                  | d(AAAAACTACTGCACGCTCGCTACGACGACACTGTCGCGC<br>ATACAAGCTGCAAAAA- <i>BtnTg</i> )         |
| SPR                                    | LTR-II+III+IV           | TTTTTGGGGACTTTCCAGGGAGGCGTGGCCTGGGCGGGAC<br>TGGGGAGTGGTTTTT                           |
|                                        | LTR-II+III+IV<br>M4+5   | TTTTTGGGGACTTTCCAGGGAGGCGTGGCCTGTGCGTGACT<br>GGGGAGTGGTTTTT                           |
|                                        | LTR-II+III+IV<br>random | AAAAACTACTGCACGCTCGCTACGACGACACTGTCGCGCA<br>TACAAGCTGCAAAAA                           |
| <i>Taq</i><br>polymerase<br>stop assay | Taq Primer              | GGCAAAAAGCAGCTGCTTATATGCAG                                                            |
|                                        | LTR-II+III+IV           | TTTTTGGGGACTTTCCAGGGAGGCGTGGCCTGGGCGGGAC<br>TGGGGAGTGGTTTTTCTGCATATAAGCAGCTGCTTTTTGCC |
|                                        | LTR-II+III+IV<br>M4+5   | TTTTTGGGGACTTTCCAGGGAGGCGTGGCCTGTGCGTGACT<br>GGGGAGTGGTTTTTCTGCATATAAGCAGCTGCTTTTTGCC |
|                                        | LTR-III+IV              | TTTTTGGGAGGCGTGGCCTGGGCGGGACTGGGGAGTGGTT<br>TTTCTGCATATAAGCAGCTGCTTTTTGCC             |
|                                        | LTR-III                 | TTTTTGGGAGGCGTGGCCTGGGCGGGACTGGGGTTTTTCTG<br>CATATAAGCAGCTGCTTTTTGCC                  |
| FRET                                   | LTR-II+III+IV           | d(6FAM-<br>TGGGGACTTTCCAGGGAGGCGTGGCCTGGGCGGGACTGGG<br>GAGTGGT- <i>TAMRA</i> )        |
|                                        | LTR-III+IV              | d(6FAM-<br>TGGGAGGCGTGGCCTGGGCGGGACTGGGGAGTGGT-<br><i>TAMRA</i> )                     |

|    |               |                                              |
|----|---------------|----------------------------------------------|
|    | LTR-III       | d(6FAM-TGGGAGGCGTGGCCTGGGCGGGACTGGGGT-TAMRA) |
|    | LTR-IV        | d(6FAM-TGGGCGGGACTGGGGAGTGGT-TAMRA)          |
| CD | LTR-II+III+IV | GGGGACTTTCAGGGAGGCGTGGCCTGGGCGGGACTGGGGAGTGG |
|    | LTR-III+IV    | GGGAGGCGTGGCCTGGGCGGGACTGGGGAGTGG            |
|    | LTR-III       | GGGAGGCGTGGCCTGGGCGGGACTGGGG                 |
|    | LTR-IV        | GGGCGGGACTGGGGAGTGG                          |

**Table S2.** Energy Transfer (E), Energy Transfer Difference ( $\Delta E$ ) and Radius ( $\text{\AA}$ ) of LTRs in the absence or presence of hnRNPA2 or BSA, at different  $K^+$  concentrations.

| LTR       | $K^+$<br>(mM) | E           |            |             | $\Delta E^*$ |       |       | R ( $\text{\AA}$ ) |      |      |
|-----------|---------------|-------------|------------|-------------|--------------|-------|-------|--------------------|------|------|
|           |               | G4          | A2         | BSA         | G4           | A2    | BSA   | G4                 | A2   | BSA  |
| II+III+IV | 100           | 0,84±0,002  | 0,53±0,02  | 0,82±0,002  | 0,727        | 0,309 | 0,018 | 38,1               | 49,1 | 38,9 |
|           | 50            | 0,81±0,002  | 0,22±0,009 | 0,81±0,006  | 0,716        | 0,564 | 0,024 | 38,6               | 59,4 | 39,6 |
|           | 25            | 0,83±0,003  | 0,26±0,02  | 0,80±0,0008 | 0,705        | 0,592 | 0,006 | 39,0               | 61,6 | 39,3 |
| III+IV    | 100           | 0,72±0,006  | 0,50±0,01  | 0,70±0,002  | 0,709        | 0,222 | 0,017 | 42,8               | 50,2 | 43,4 |
|           | 50            | 0,68±0,002  | 0,35±0,002 | 0,66±0,006  | 0,675        | 0,334 | 0,025 | 44,0               | 55,5 | 44,8 |
|           | 25            | 0,65±0,002  | 0,34±0,02  | 0,63±0,005  | 0,646        | 0,317 | 0,028 | 43,6               | 56,0 | 45,9 |
| III       | 100           | 0,80±0,004  | 0,73±0,006 | 0,77±0,012  | 0,781        | 0,066 | 0,021 | 39,6               | 42,2 | 40,8 |
|           | 50            | 0,81±0,002  | 0,70±0,015 | 0,77±0,001  | 0,791        | 0,106 | 0,037 | 39,2               | 42,2 | 40,7 |
|           | 25            | 0,81±0,006  | 0,66±0,01  | 0,77±0,002  | 0,786        | 0,141 | 0,033 | 39,4               | 44,6 | 40,8 |
| IV        | 100           | 0,60±0,0007 | 0,46±0,01  | 0,53±0,02   | 0,452        | 0,141 | 0,053 | 46,6               | 51,3 | 48,9 |
|           | 50            | 0,61±0,003  | 0,46±0,03  | 0,63±0,02   | 0,465        | 0,153 | 0,004 | 46,2               | 51,3 | 46,4 |
|           | 25            | 0,61±0,002  | 0,39±0,01  | 0,57±0,003  | 0,461        | 0,218 | 0,039 | 46,4               | 53,8 | 47,6 |

\*For free G-quadruplex,  $\Delta E$  was calculated between the single-stranded oligonucleotide and the corresponding duplex.

**Fig. S1.** FRET-melting curves of untreated LTR-II+III+IV in the absence and presence of hnRNPA2 1:10, or of BSA as control, at a)  $K^+$  25 mM and b) 50 mM. c) and d) Corresponding first derivative curves,  $dF/dT$  versus T.

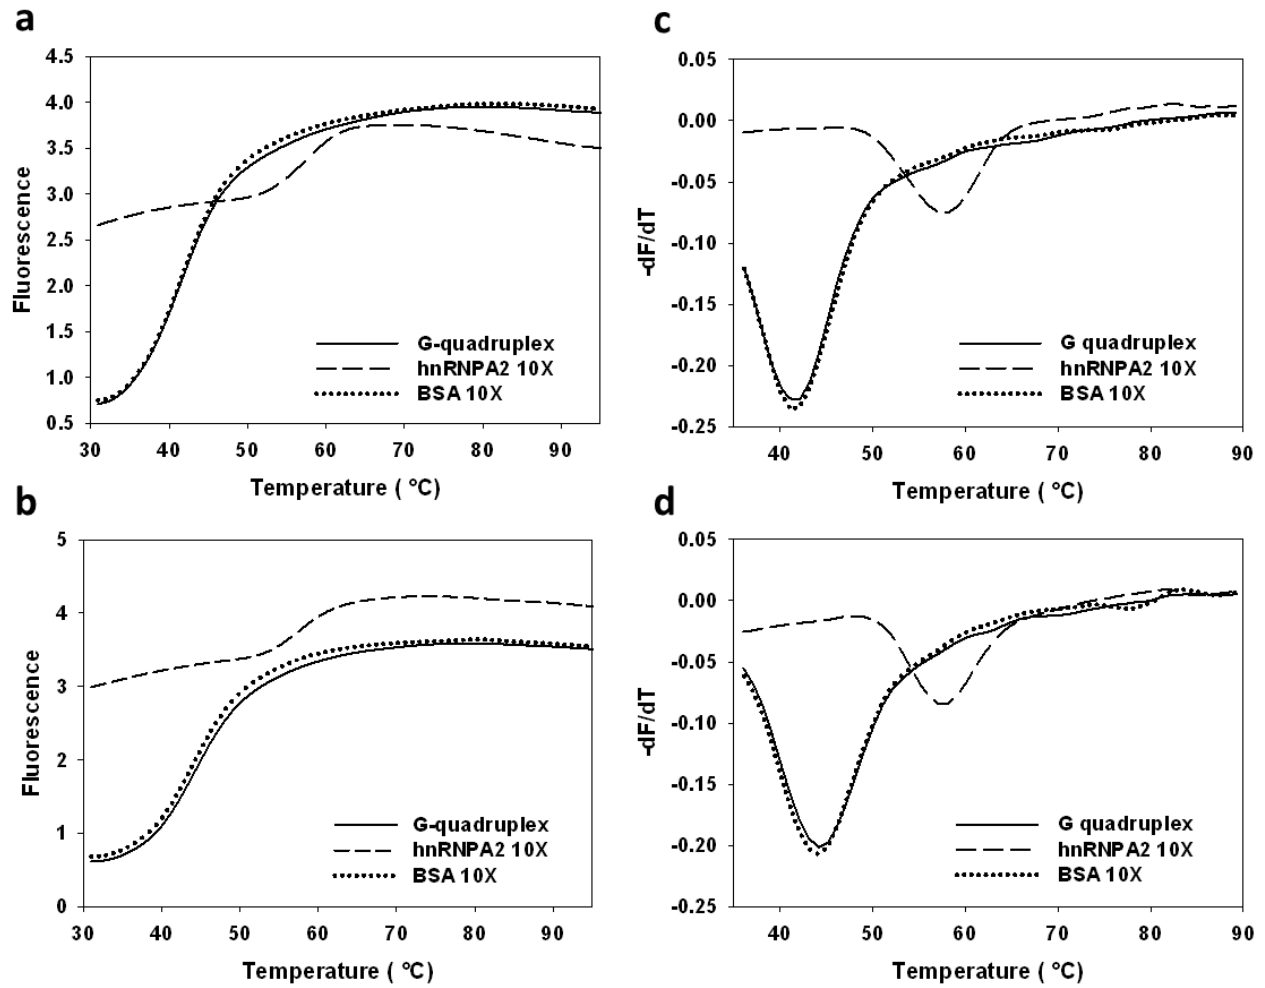

**Fig. S2.** FRET-melting curves of untreated LTR-III+IV in the absence and presence of hnRNPA2 1:10, or of BSA as control, at a)  $K^+$  25 mM, b) 50 mM and c) 100 mM. d), e) and f) Corresponding first derivative curves,  $-dF/dT$  versus T.

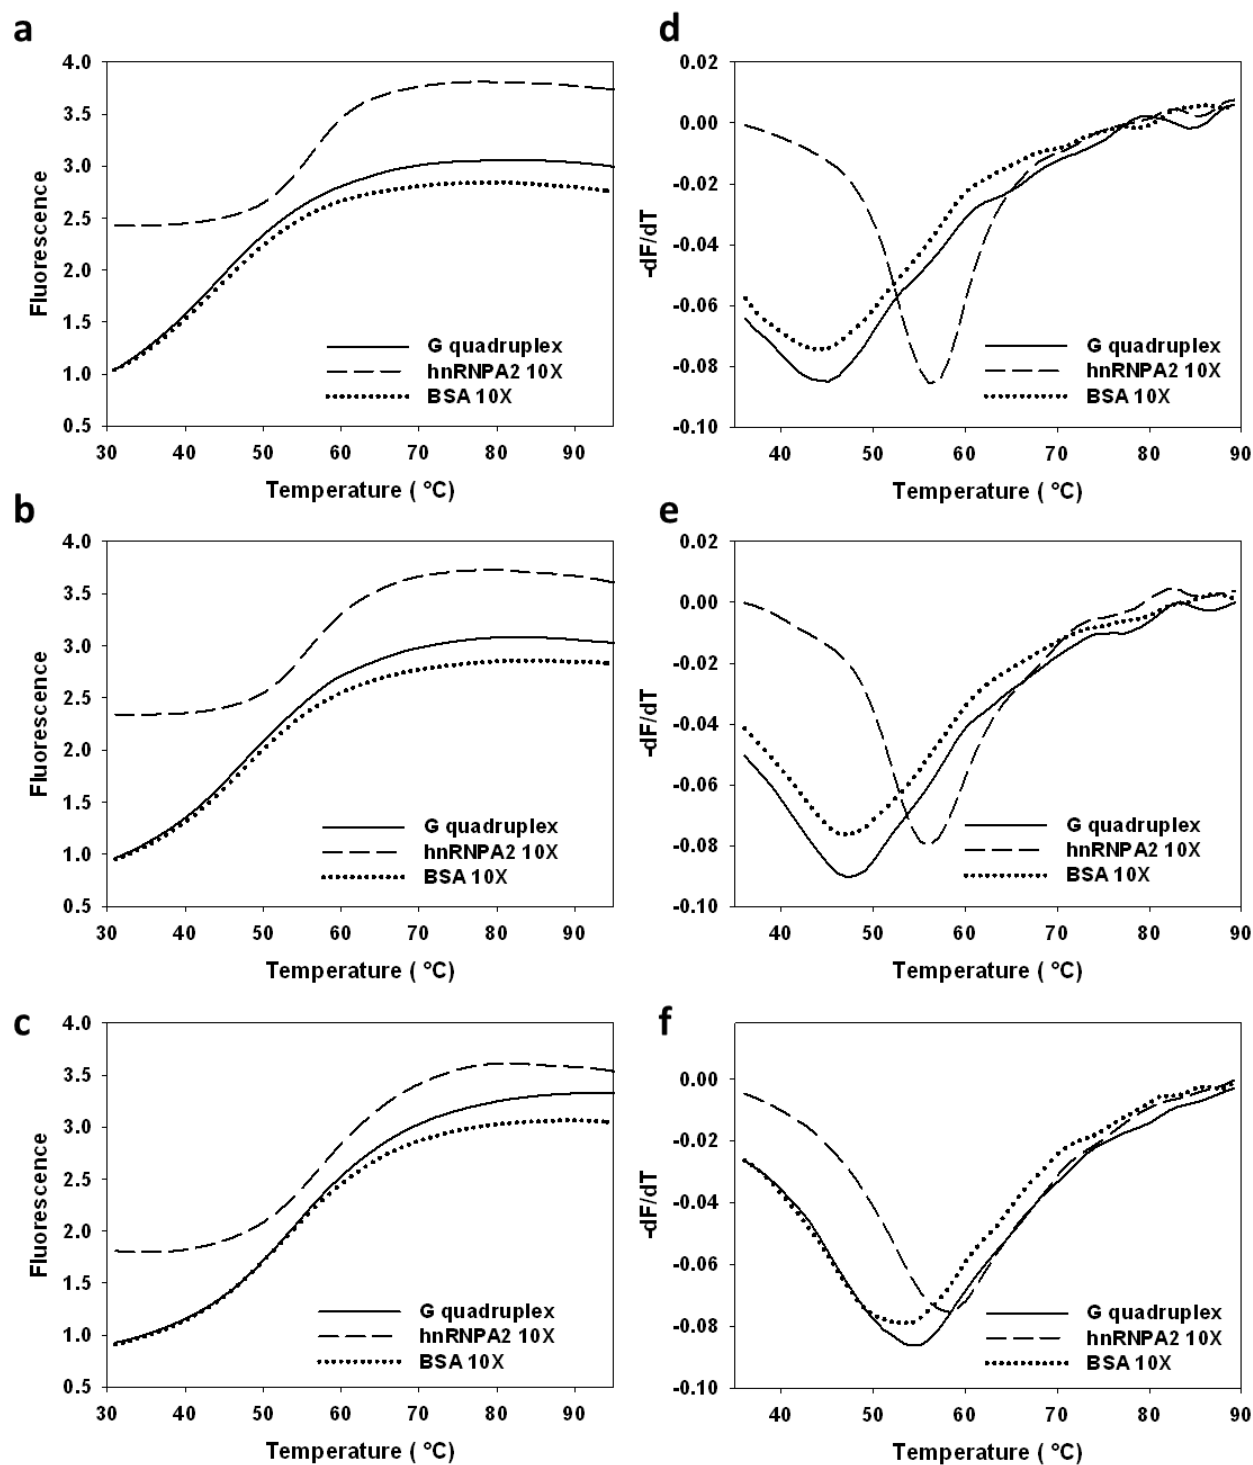

**Fig. S3.** A) FRET-melting curves of untreated LTR-III in the absence and presence of hnRNPA2 1:10, or of BSA as control, at a)  $K^+$  25 mM, b) 50 mM and c) 100 mM. d), e) and f) Corresponding first derivative curves,  $-dF/dT$  versus T.

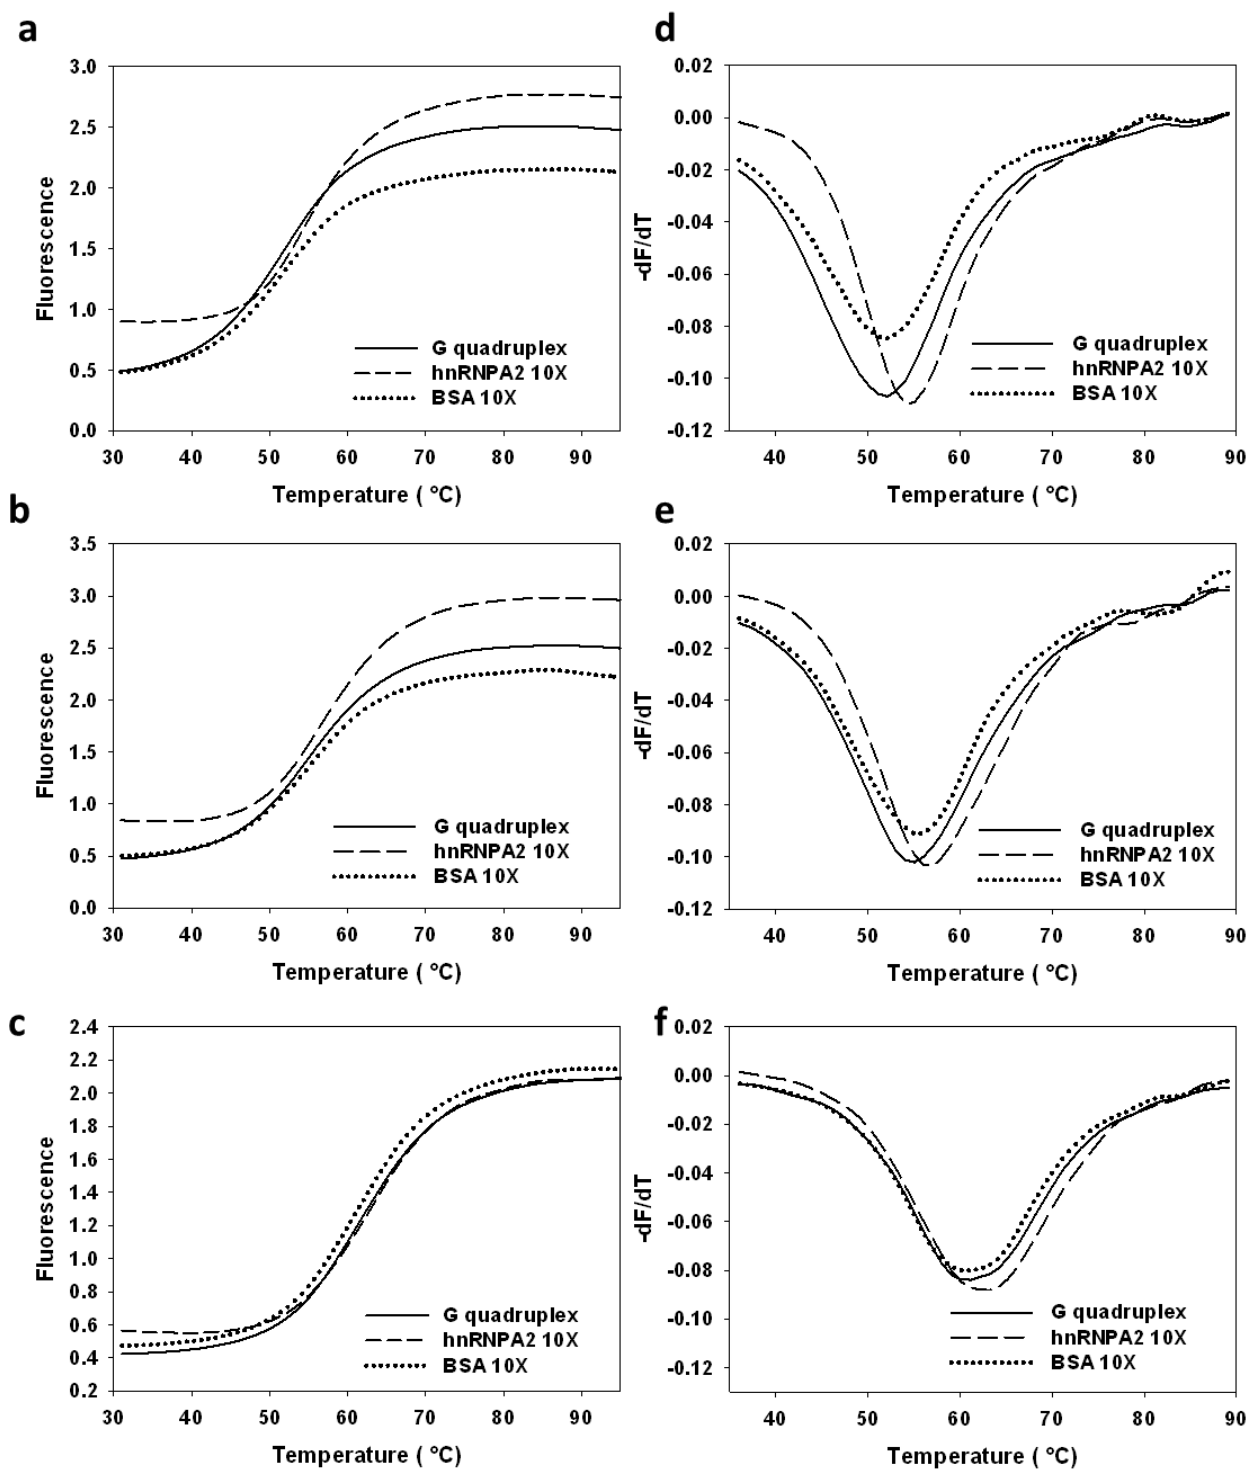

**Fig. S4.** A) FRET-melting curves of untreated LTR-IV in the absence and presence of hnRNPA2 1:10, or of BSA as control, at a)  $K^+$  25 mM, b) 50 mM and c) 100 mM. d), e) and f) Corresponding first derivative curves,  $dF/dT$  versus T.

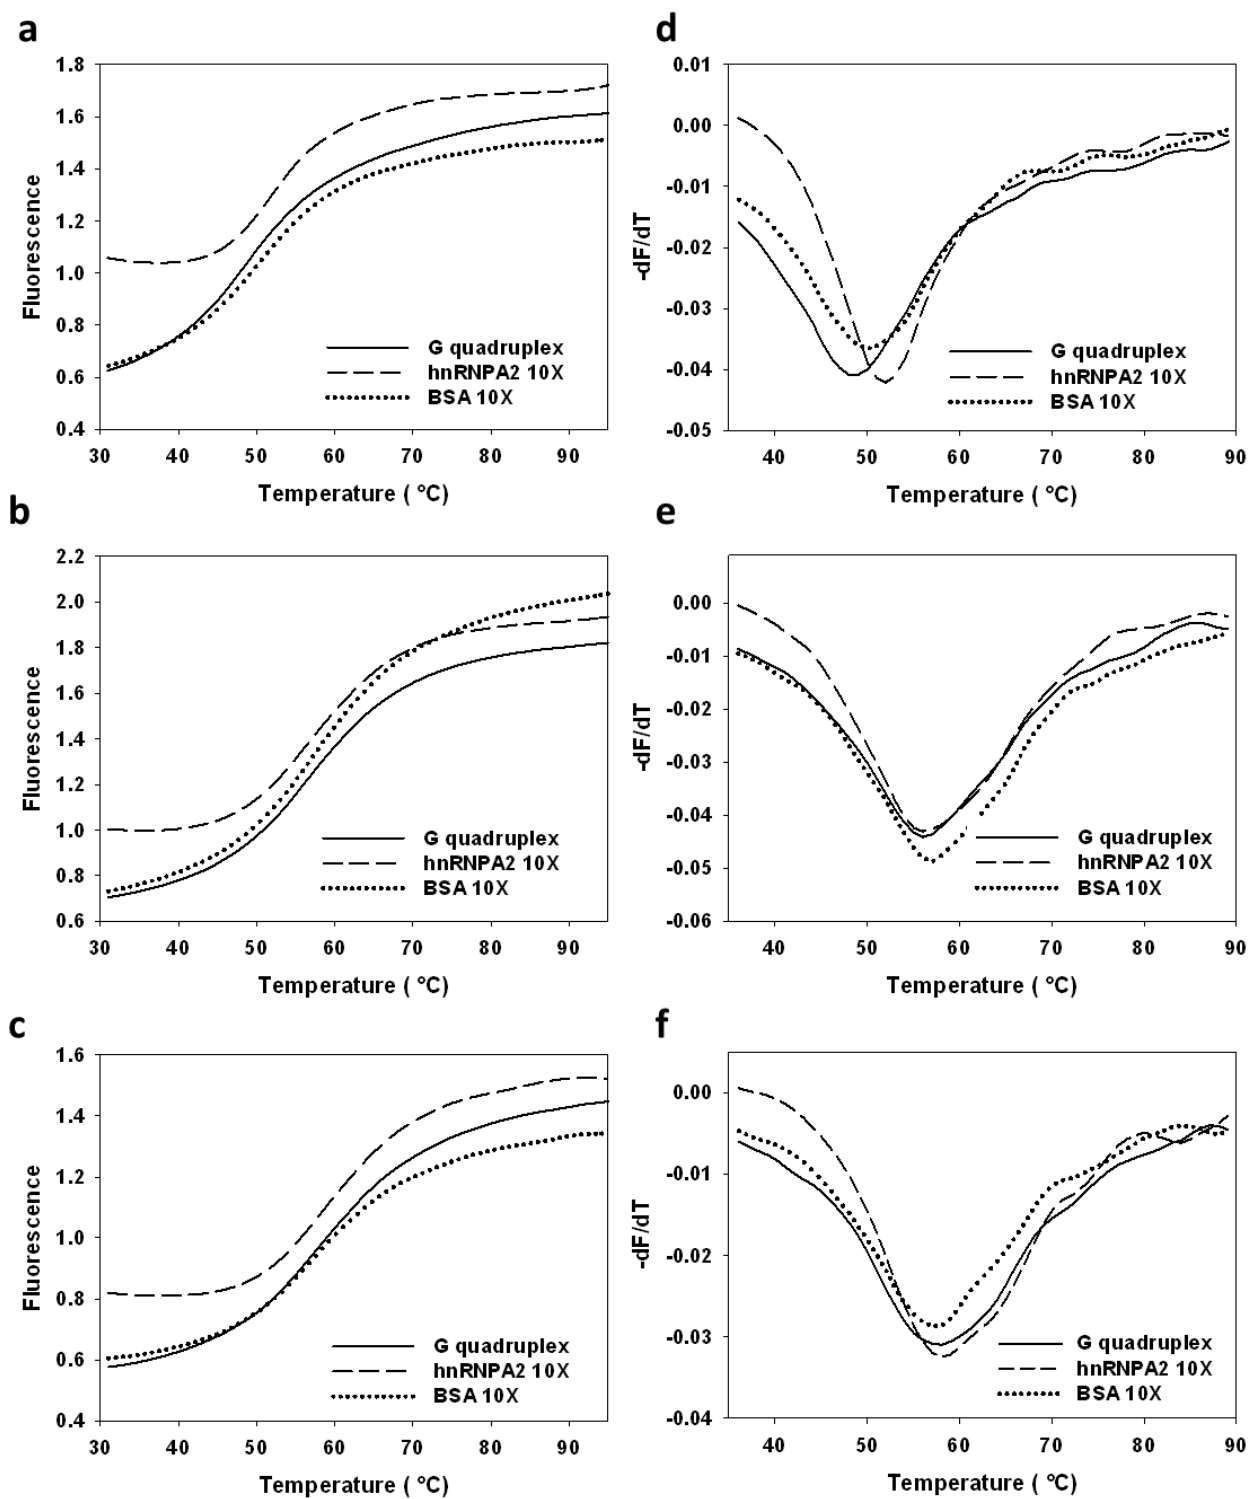

**Fig. S5.** Activity of hnRNP A2/B1 on the HIV-1 LTR promoter in TZM-bl cells. A) hnRNP A2/B1 depletion in TZM-bl cells by siRNAs analysed by western blot with anti hnRNP A2/B1 antibody. Scra indicates scrambled siRNAs. Detection of  $\alpha$ -tubulin ( $\alpha$ t) was used as control. NT indicates untreated cells. The symbol / indicates cells treated only with Lipofectamine RNAiMAX . B) Analysis of the luciferase activity of the LTR wt promoter in TZM-bl cells treated with hnRNP A2/B1 siRNAs, normalized to protein content.

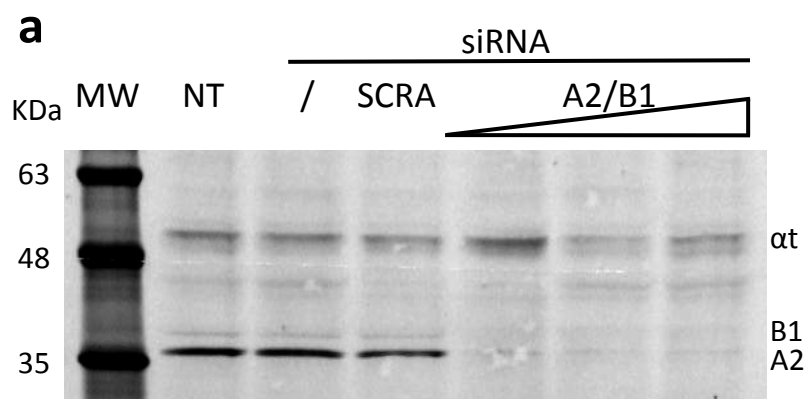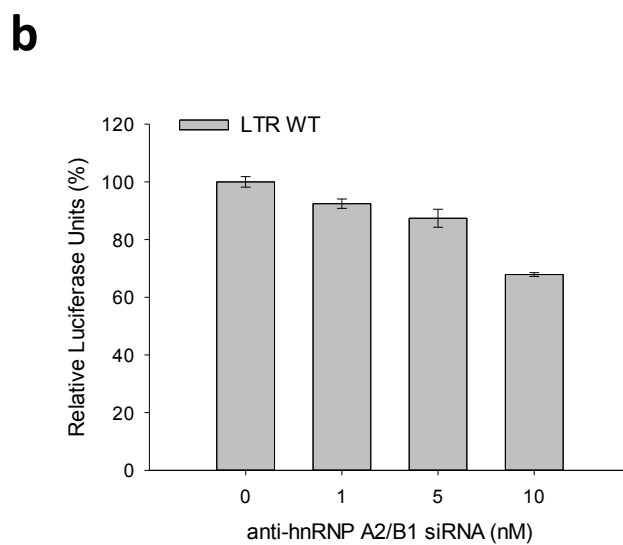

Supplement: srep45244-s1.pdf [file srep45244-s1.pdf]
